# Supplementary material for: The highly selective synthesis of 5-methyl vanillin from the by-product in vanilla industry and the scent influence for vanillin
Source: Royal Society of Chemistry journal article supplement (doi:10.1039/d1se00011j), 2021-01-01
Supplement: d1se00011j1.pdf [file d1se00011j1.pdf]

## Supporting Information

### The Highly Selective Synthesis of 5-Methy Vanillin from the By-product in Vanilla Industry and The Scent Influence for Vanillin

Haifang Mao<sup>a</sup>, Hongzhao Wang<sup>a</sup>, Ting Tang<sup>b\*</sup>, Qixuan Shi<sup>b</sup>, Haiyan Yu<sup>b</sup>,  
Xiaojun Hu<sup>a\*</sup>, Zuobing Xiao<sup>b</sup>, Pingyi Zhang<sup>a</sup>, Jibo Liu<sup>a\*</sup>

*a. School of Chemical and Environmental Engineering, Shanghai Institute of Technology, 100 Haiquan Road, 201418, Shanghai, China.*

*b. School of Perfume and Aroma Technology, Shanghai Institute of Technology, 100 Haiquan Road, Shanghai, 201418, China.*

## **1 Preparation and characterization of Pd/CSC**

### **1.1 Preparation of Catalyst Pd/CSC**

To remove impurities and modify surface functional groups, the CSC (Coconut shell carbon) (10.0 g) was refluxed at 90 °C in HNO<sub>3</sub> (100 mL) for 6 hours. After that, the mixture was cooled to room temperature and then filtered and washed repeatedly using distilled water for 3 times and dried in vacuum. Finally, the obtained CSC was dried at 120 °C for 12 hours. The supported Pd catalysts were prepared by incipient-wetness impregnation of CSC with aqueous solutions of Pd(NO<sub>3</sub>)<sub>2</sub> respectively. After impregnation, the catalysts were dried in air at 110 °C for 3 hours and finally reduced in H<sub>2</sub> at 400 °C for 3 hours.

### **1.2 Characterization of the Prepared Pd/CSC Composite Catalyst**

X-ray data on suitable single crystals were collected at 293 K with a Focus D8 (Bruker, Germany) with Cu K $\alpha$  radiation ( $\lambda = 0.1542$  nm). The composition and structure of these catalyst samples were investigated using a Raman spectrometer (DXR, Thermo Fisher Scientific, America). The X-ray photoelectron spectroscopy (XPS) experiments were performed on a Thermo Escalab 250Xi system using Al K $\alpha$  radiation ( $h\nu = 1486.6$  eV). The Brunauer-Emmett-Teller (BET) specific surface areas of typical products were obtained at 77 K in a Micromeritics ASAP 2020 system. The morphology of the as-prepared catalyst was characterized by field-emission scanning electron microscopy (S-3400N, Hitachi, Japan).

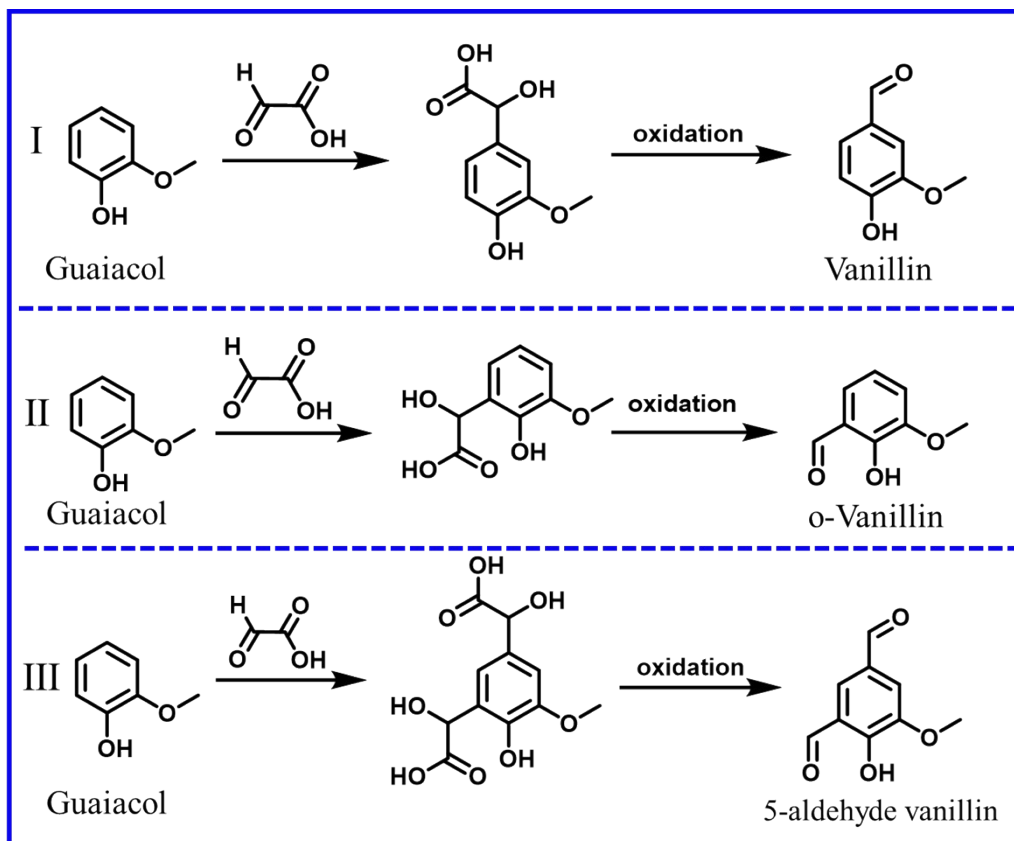

**Scheme S1** The preparation method of Vanillin form guaiacol.

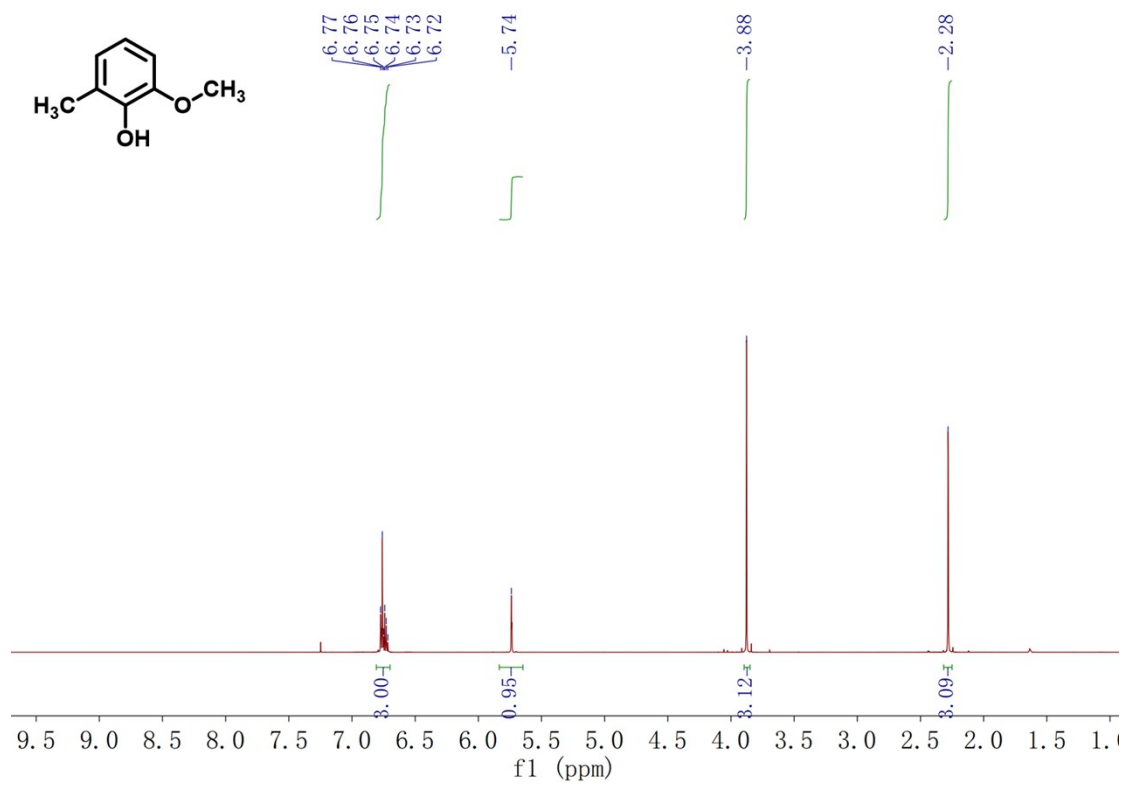

**Fig.S1** The <sup>1</sup>H NMR of M-Guaiacol

<sup>1</sup>H NMR (600 MHz, CDCl<sub>3</sub>, Me<sub>4</sub>Si) 6.77-6.73 (3H, m), 5.74 (1H, s), 3.88 (3H, s), 2.28 (3H, s).

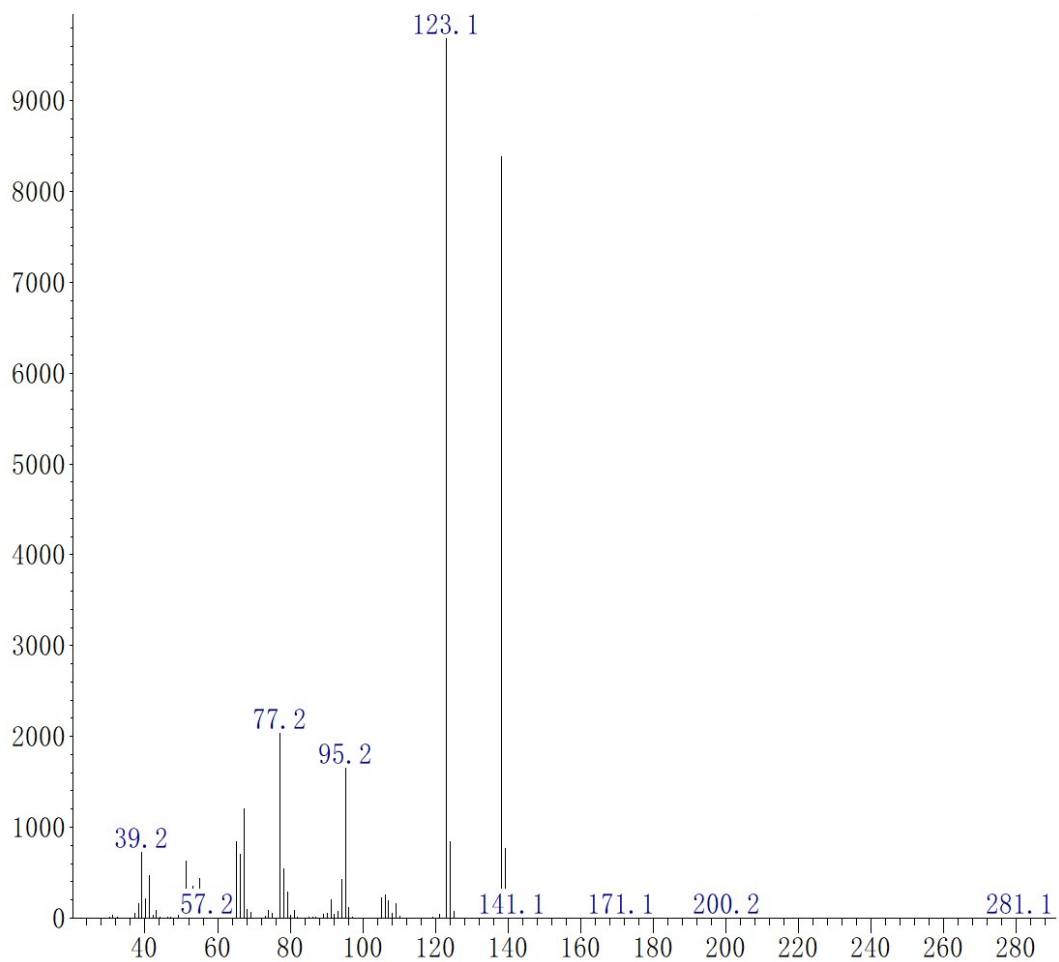

**Fig.S2** Gas chromatography - mass spectrometry(GC-MS) of M-Guaiacol.

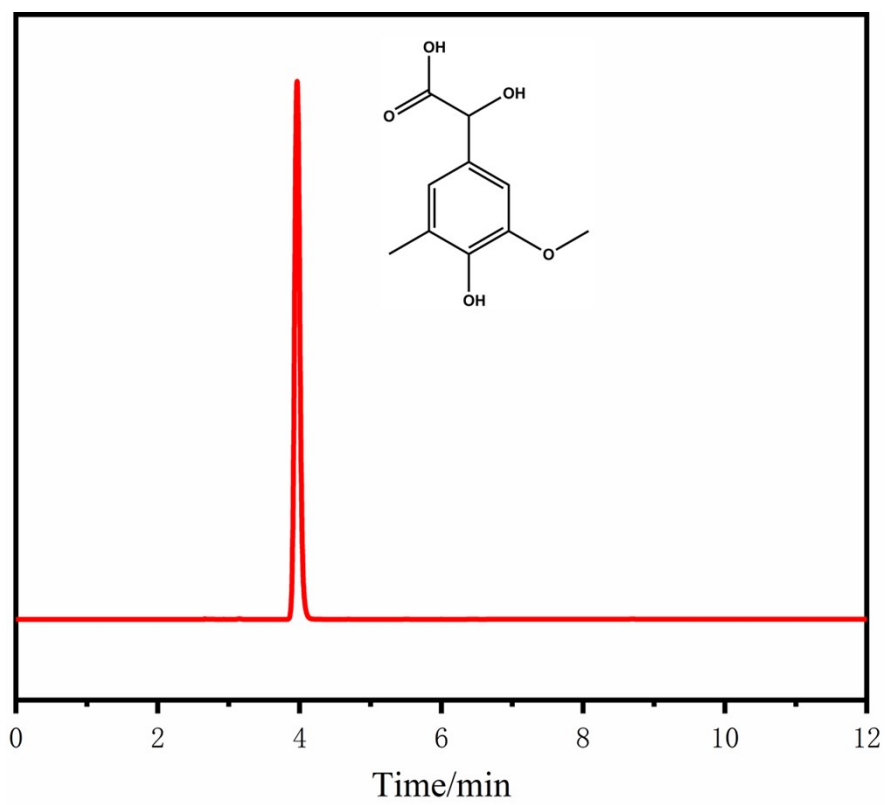

**Fig.S3** Liquid phase spectrogram of 5-MVMA.

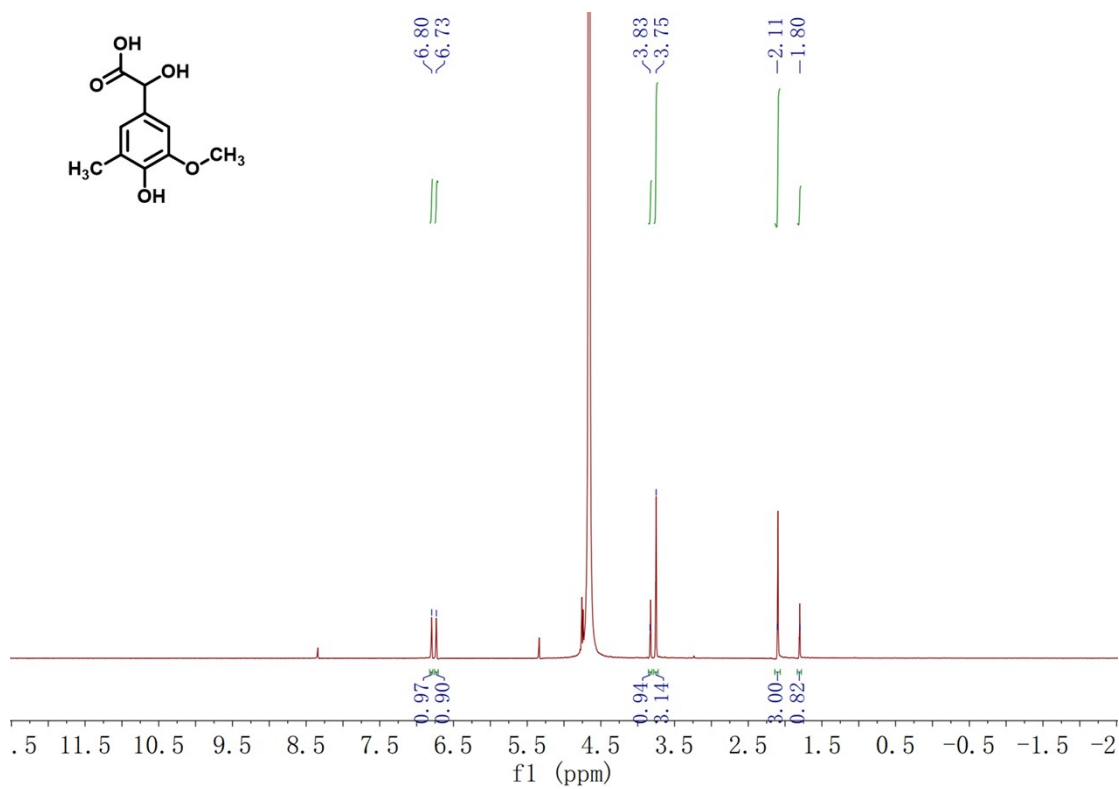

**Fig.S4** The <sup>1</sup>H NMR of 5-MVMA

<sup>1</sup>H NMR (600 MHz, D<sub>2</sub>O, Me<sub>4</sub>Si) 6.80 (1H, s), 6.73 (1H, s), 3.83 (1H, s), 3.75 (3H, s), 2.11 (3H, s), 1.80 (1H, s).

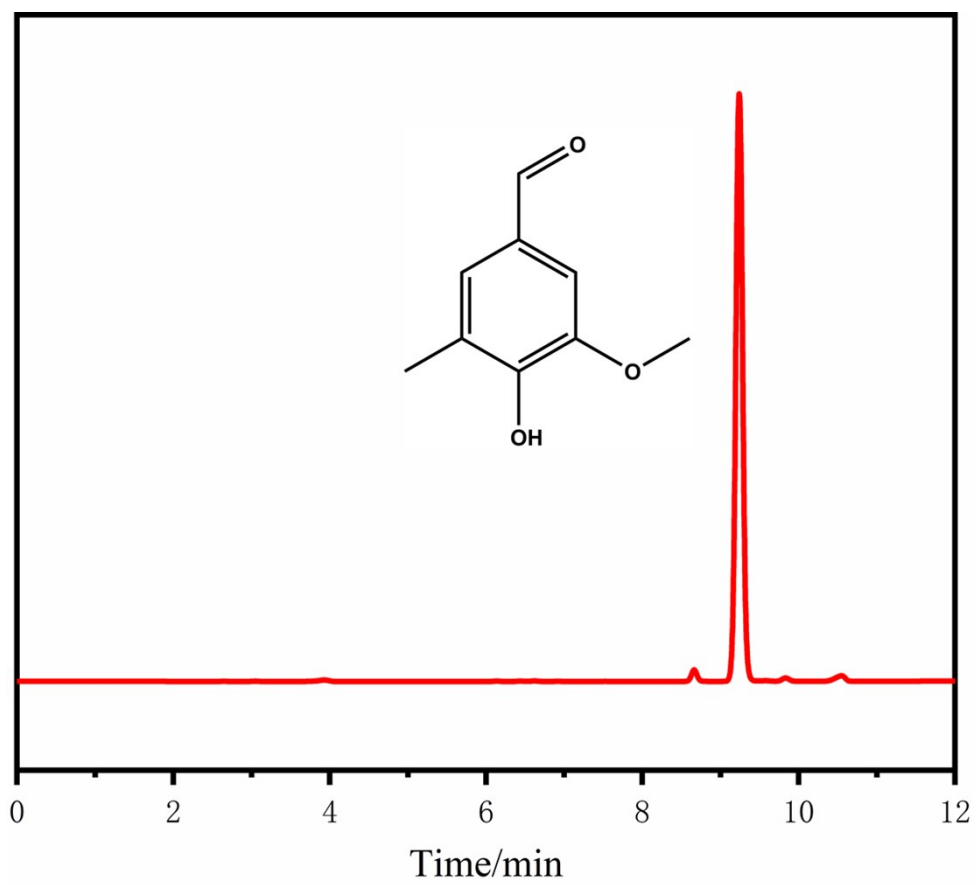

**Fig.S5** Liquid phase spectrogram of M-Vanillin.



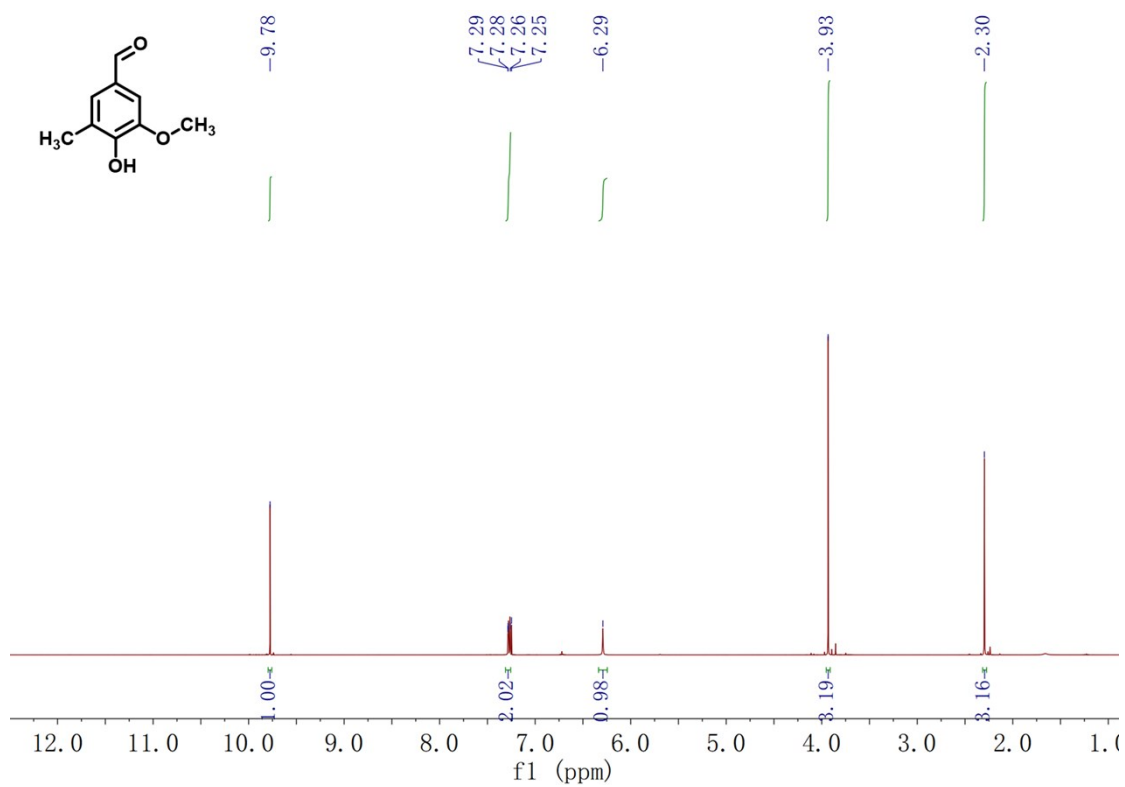

**Fig.S6** The <sup>1</sup>H NMR of M-Vanillin

**<sup>1</sup>H NMR (600 MHz, CDCl<sub>3</sub>, Me<sub>4</sub>Si) 9.79 (1H, s), 7.29-7.26 (2H, m), 6.29 (1H, s), 3.93 (3H, s), 2.30 (3H, s).**

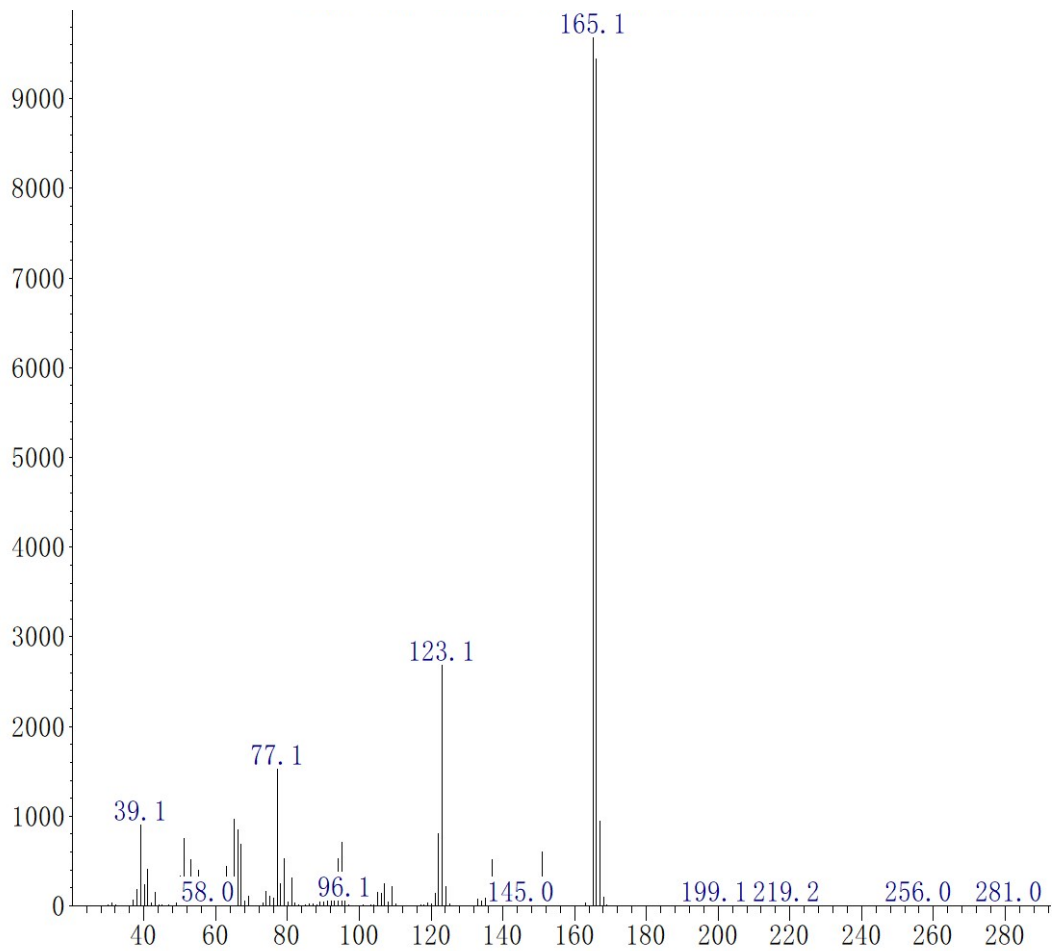

**Fig.S7** Gas chromatography - mass spectrometry (GC-MS) of M-Vanillin.

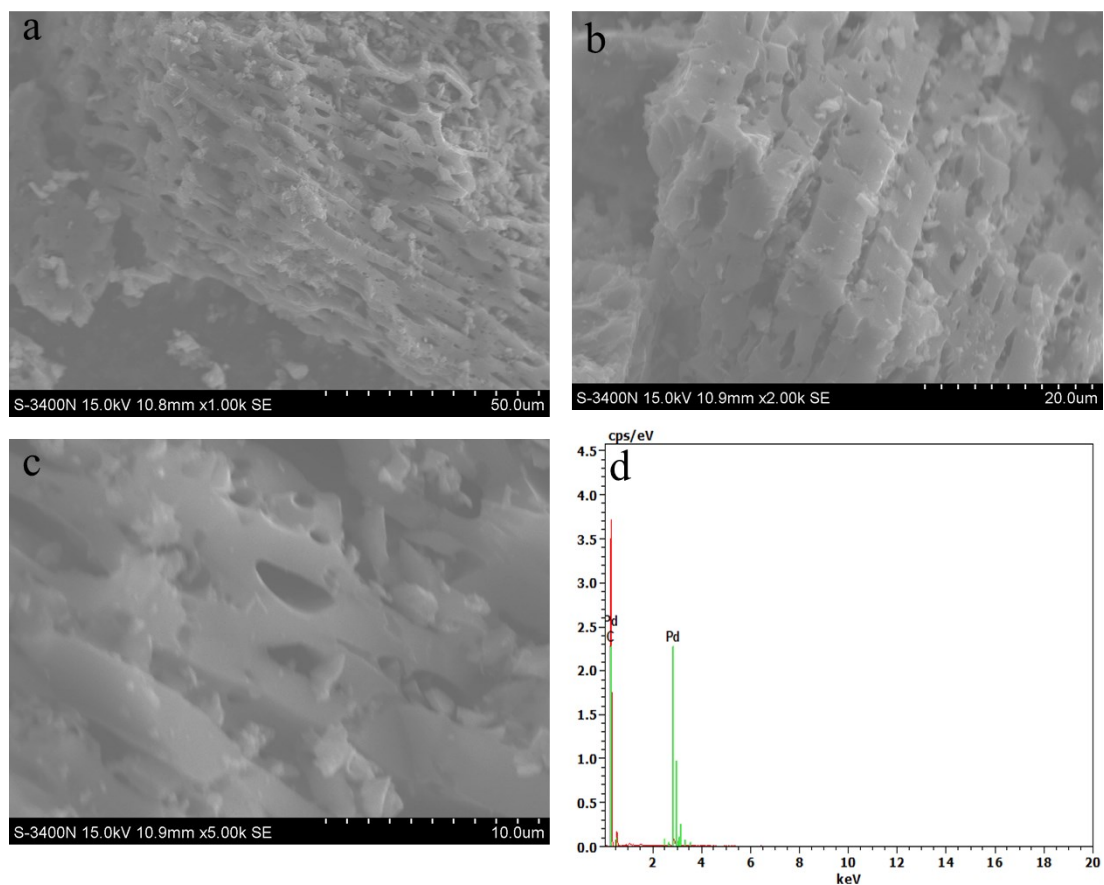

**Fig.S8** (a~c) Field Emission Scanning Electron Microscope (SEM) sketch of Pd/CSC, (d) Energy dispersive spectroscopy (EDS) sketch of Pd/CSC.
